# Supplementary material for: Mechanosensitive super-enhancers regulate genes linked to atherosclerosis in endothelial cells
Source: PubMed Central journal article supplement (PMC10794123; doi:10.1083/jcb.202211125), 2024-01-17

SourceDataF7

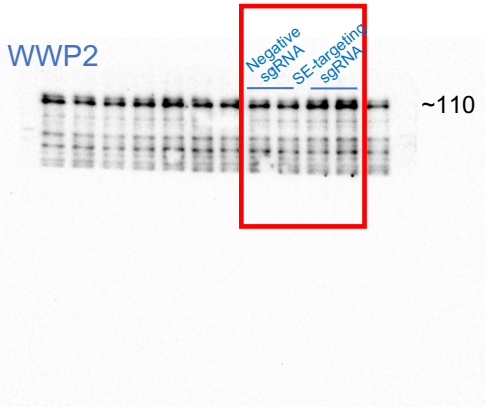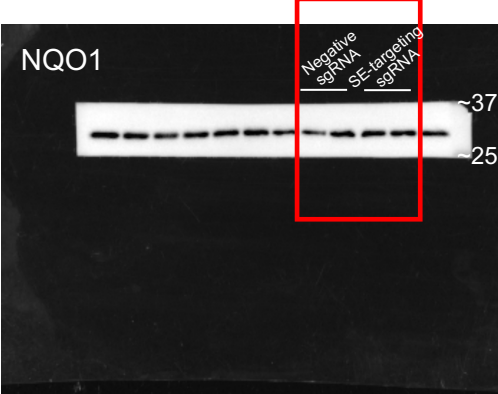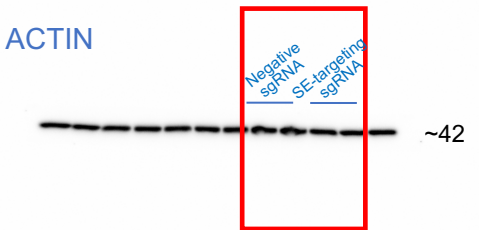

Supplement: JCB_202211125_SourceDataF7.pdf [file JCB_202211125_SourceDataF7.pdf]
